# Supplementary material for: Protein engineering of Saccharomyces cerevisiae transporter Pdr5p identifies key residues that impact Fusarium mycotoxin export and resistance to inhibition
Source: PubMed Central journal article supplement (PMC5221463; doi:10.1002/mbo3.381), 2016-06-04

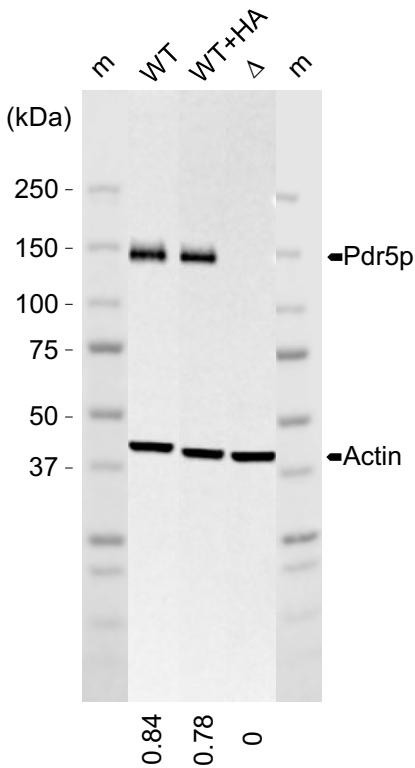

Supplement: MBO3-5-979-s001.pdf [file MBO3-5-979-s001.pdf]
