# Supplementary material for: Protein engineering of Saccharomyces cerevisiae transporter Pdr5p identifies key residues that impact Fusarium mycotoxin export and resistance to inhibition
Source: PubMed Central journal article supplement (PMC5221463; doi:10.1002/mbo3.381), 2016-06-04
Supplement: MBO3-5-979-s003.pdf [file MBO3-5-979-s003.pdf]

TMH11 (1355-1379)

|                  |                        |   |                       |
|------------------|------------------------|---|-----------------------|
| S1360A-1_protein | GSMGLLVI SFNQVAESAANLA | A | LLFTMSLSFCGVMTTPSAMPR |
| S1360A-4_protein | GSMGLLVI SFNQVAESAANLA | A | LLFTMSLSFCGVMTTPSAMPR |
| S1360C-1_protein | GSMGLLVI SFNQVAESAANLA | C | LLFTMSLSFCGVMTTPSAMPR |
| S1360C-3_protein | GSMGLLVI SFNQVAESAANLA | C | LLFTMSLSFCGVMTTPSAMPR |
| S1360D-5_protein | GSMGLLVI SFNQVAESAANLA | D | LLFTMSLSFCGVMTTPSAMPR |
| S1360D-6_protein | GSMGLLVI SFNQVAESAANLA | D | LLFTMSLSFCGVMTTPSAMPR |
| S1360E-1_protein | GSMGLLVI SFNQVAESAANLA | E | LLFTMSLSFCGVMTTPSAMPR |
| S1360E-3_protein | GSMGLLVI SFNQVAESAANLA | E | LLFTMSLSFCGVMTTPSAMPR |
| S1360F-1_protein | GSMGLLVI SFNQVAESAANLA | F | LLFTMSLSFCGVMTTPSAMPR |
| S1360F-4_protein | GSMGLLVI SFNQVAESAANLA | F | LLFTMSLSFCGVMTTPSAMPR |
| S1360G-3_protein | GSMGLLVI SFNQVAESAANLA | G | LLFTMSLSFCGVMTTPSAMPR |
| S1360G-4_protein | GSMGLLVI SFNQVAESAANLA | G | LLFTMSLSFCGVMTTPSAMPR |
| S1360H-1_protein | GSMGLLVI SFNQVAESAANLA | H | LLFTMSLSFCGVMTTPSAMPR |
| S1360H-5_protein | GSMGLLVI SFNQVAESAANLA | H | LLFTMSLSFCGVMTTPSAMPR |
| S1360I-3_protein | GSMGLLVI SFNQVAESAANLA | I | LLFTMSLSFCGVMTTPSAMPR |
| S1360I-4_protein | GSMGLLVI SFNQVAESAANLA | I | LLFTMSLSFCGVMTTPSAMPR |
| S1360K-1_protein | GSMGLLVI SFNQVAESAANLA | K | LLFTMSLSFCGVMTTPSAMPR |
| S1360K-4_protein | GSMGLLVI SFNQVAESAANLA | K | LLFTMSLSFCGVMTTPSAMPR |
| S1360L-1_protein | GSMGLLVI SFNQVAESAANLA | L | LLFTMSLSFCGVMTTPSAMPR |
| S1360L-3_protein | GSMGLLVI SFNQVAESAANLA | L | LLFTMSLSFCGVMTTPSAMPR |
| S1360M-4_protein | GSMGLLVI SFNQVAESAANLA | M | LLFTMSLSFCGVMTTPSAMPR |
| S1360M-5_protein | GSMGLLVI SFNQVAESAANLA | M | LLFTMSLSFCGVMTTPSAMPR |
| S1360N-2_protein | GSMGLLVI SFNQVAESAANLA | N | LLFTMSLSFCGVMTTPSAMPR |
| S1360N-4_protein | GSMGLLVI SFNQVAESAANLA | N | LLFTMSLSFCGVMTTPSAMPR |
| S1360P-1_protein | GSMGLLVI SFNQVAESAANLA | P | LLFTMSLSFCGVMTTPSAMPR |
| S1360P-3_protein | GSMGLLVI SFNQVAESAANLA | P | LLFTMSLSFCGVMTTPSAMPR |
| S1360Q-4_protein | GSMGLLVI SFNQVAESAANLA | Q | LLFTMSLSFCGVMTTPSAMPR |
| S1360Q-7_protein | GSMGLLVI SFNQVAESAANLA | Q | LLFTMSLSFCGVMTTPSAMPR |
| S1360R-1_protein | GSMGLLVI SFNQVAESAANLA | R | LLFTMSLSFCGVMTTPSAMPR |
| S1360R-4_protein | GSMGLLVI SFNQVAESAANLA | R | LLFTMSLSFCGVMTTPSAMPR |
| S1360T-3_protein | GSMGLLVI SFNQVAESAANLA | T | LLFTMSLSFCGVMTTPSAMPR |
| S1360T-4_protein | GSMGLLVI SFNQVAESAANLA | T | LLFTMSLSFCGVMTTPSAMPR |
| S1360V-2_protein | GSMGLLVI SFNQVAESAANLA | V | LLFTMSLSFCGVMTTPSAMPR |
| S1360V-4_protein | GSMGLLVI SFNQVAESAANLA | V | LLFTMSLSFCGVMTTPSAMPR |
| S1360W-2_protein | GSMGLLVI SFNQVAESAANLA | W | LLFTMSLSFCGVMTTPSAMPR |
| S1360W-4_protein | GSMGLLVI SFNQVAESAANLA | W | LLFTMSLSFCGVMTTPSAMPR |
| S1360Y-1_protein | GSMGLLVI SFNQVAESAANLA | Y | LLFTMSLSFCGVMTTPSAMPR |
| S1360Y-5_protein | GSMGLLVI SFNQVAESAANLA | Y | LLFTMSLSFCGVMTTPSAMPR |
