# Supplementary material for: Protein engineering of Saccharomyces cerevisiae transporter Pdr5p identifies key residues that impact Fusarium mycotoxin export and resistance to inhibition
Source: Microbiologyopen. 2016 Jun 4;5(6):979–91. doi: 10.1002/mbo3.381 (PMC5221463; doi:10.1002/mbo3.381)
Supplement: Supplementary file 4 — Figure S4. Portion of the aligned amino acid sequences obtained following the sequencing of each T1364 Pdr5p variant. [file MBO3-5-979-s004.pdf]

TMH11 (1355-1379)

|                  |          |                   |   |                   |
|------------------|----------|-------------------|---|-------------------|
| T1364A-1_protein | GSMGLLVI | SFNQVAESAANLASLLF | A | MSLSFCGVMTTPSAMPR |
| T1364A-2_protein | GSMGLLVI | SFNQVAESAANLASLLF | A | MSLSFCGVMTTPSAMPR |
| T1364C-1_protein | GSMGLLVI | SFNQVAESAANLASLLF | C | MSLSFCGVMTTPSAMPR |
| T1364C-4_protein | GSMGLLVI | SFNQVAESAANLASLLF | C | MSLSFCGVMTTPSAMPR |
| T1364D-1_protein | GSMGLLVI | SFNQVAESAANLASLLF | D | MSLSFCGVMTTPSAMPR |
| T1364D-4_protein | GSMGLLVI | SFNQVAESAANLASLLF | D | MSLSFCGVMTTPSAMPR |
| T1364E-1_protein | GSMGLLVI | SFNQVAESAANLASLLF | E | MSLSFCGVMTTPSAMPR |
| T1364E-2_protein | GSMGLLVI | SFNQVAESAANLASLLF | E | MSLSFCGVMTTPSAMPR |
| T1364F-1_protein | GSMGLLVI | SFNQVAESAANLASLLF | F | MSLSFCGVMTTPSAMPR |
| T1364F-3_protein | GSMGLLVI | SFNQVAESAANLASLLF | F | MSLSFCGVMTTPSAMPR |
| T1364G-5_protein | GSMGLLVI | SFNQVAESAANLASLLF | G | MSLSFCGVMTTPSAMPR |
| T1364G-6_protein | GSMGLLVI | SFNQVAESAANLASLLF | G | MSLSFCGVMTTPSAMPR |
| T1364H-2_protein | GSMGLLVI | SFNQVAESAANLASLLF | H | MSLSFCGVMTTPSAMPR |
| T1364H-5_protein | GSMGLLVI | SFNQVAESAANLASLLF | H | MSLSFCGVMTTPSAMPR |
| T1364I-2_protein | GSMGLLVI | SFNQVAESAANLASLLF | I | MSLSFCGVMTTPSAMPR |
| T1364I-3_protein | GSMGLLVI | SFNQVAESAANLASLLF | I | MSLSFCGVMTTPSAMPR |
| T1364K-1_protein | GSMGLLVI | SFNQVAESAANLASLLF | K | MSLSFCGVMTTPSAMPR |
| T1364K-2_protein | GSMGLLVI | SFNQVAESAANLASLLF | K | MSLSFCGVMTTPSAMPR |
| T1364L-1_protein | GSMGLLVI | SFNQVAESAANLASLLF | L | MSLSFCGVMTTPSAMPR |
| T1364L-5_protein | GSMGLLVI | SFNQVAESAANLASLLF | L | MSLSFCGVMTTPSAMPR |
| T1364M-1_protein | GSMGLLVI | SFNQVAESAANLASLLF | M | MSLSFCGVMTTPSAMPR |
| T1364M-4_protein | GSMGLLVI | SFNQVAESAANLASLLF | M | MSLSFCGVMTTPSAMPR |
| T1364N-2_protein | GSMGLLVI | SFNQVAESAANLASLLF | N | MSLSFCGVMTTPSAMPR |
| T1364N-3_protein | GSMGLLVI | SFNQVAESAANLASLLF | N | MSLSFCGVMTTPSAMPR |
| T1364P-3_protein | GSMGLLVI | SFNQVAESAANLASLLF | P | MSLSFCGVMTTPSAMPR |
| T1364P-4_protein | GSMGLLVI | SFNQVAESAANLASLLF | P | MSLSFCGVMTTPSAMPR |
| T1364Q-4_protein | GSMGLLVI | SFNQVAESAANLASLLF | Q | MSLSFCGVMTTPSAMPR |
| T1364Q-6_protein | GSMGLLVI | SFNQVAESAANLASLLF | Q | MSLSFCGVMTTPSAMPR |
| T1364R-1_protein | GSMGLLVI | SFNQVAESAANLASLLF | R | MSLSFCGVMTTPSAMPR |
| T1364R-6_protein | GSMGLLVI | SFNQVAESAANLASLLF | R | MSLSFCGVMTTPSAMPR |
| T1364S-2_protein | GSMGLLVI | SFNQVAESAANLASLLF | S | MSLSFCGVMTTPSAMPR |
| T1364S-4_protein | GSMGLLVI | SFNQVAESAANLASLLF | S | MSLSFCGVMTTPSAMPR |
| T1364V-1_protein | GSMGLLVI | SFNQVAESAANLASLLF | V | MSLSFCGVMTTPSAMPR |
| T1364V-3_protein | GSMGLLVI | SFNQVAESAANLASLLF | V | MSLSFCGVMTTPSAMPR |
| T1364W-4_protein | GSMGLLVI | SFNQVAESAANLASLLF | W | MSLSFCGVMTTPSAMPR |
| T1364W-5_protein | GSMGLLVI | SFNQVAESAANLASLLF | W | MSLSFCGVMTTPSAMPR |
| T1364Y-2_protein | GSMGLLVI | SFNQVAESAANLASLLF | Y | MSLSFCGVMTTPSAMPR |
| T1364Y-6_protein | GSMGLLVI | SFNQVAESAANLASLLF | Y | MSLSFCGVMTTPSAMPR |
